# Supplementary material
Source: HighWire-hosted journal article supplement (http://www.qdcxjkg.com/highwire/filestream/113737/field_highwire_adjunct_files/0/F-ONLINE_APPENDIX_-_COCOMICS_ERJ.pdf)

## ONLINE APPENDIX

This proposed [ERJ Online Appendix](#) includes one [eTable](#), and two [eFigures](#)

### **Multicomponent indices to predict survival in COPD: The Collaborative Cohorts to assess Multicomponent Indices of COPD in Spain-COCOMICS study**

Jose M. Marin, M.D.,<sup>1</sup> Inmaculada Alfageme, M.D.,<sup>2</sup> Pere Almagro, M.D.,<sup>3</sup> Ciro Casanova, M.D.,<sup>4</sup> Cristobal Esteban, M.D.,<sup>5</sup> Juan J. Soler-Cataluña, M.D.,<sup>6</sup> Juan P. de Torres, M.D.,<sup>7</sup> Pablo Martinez-Cambor, Ph.D.,<sup>8</sup> Marc Miravittles, M.D.,<sup>9</sup> Bartolome R. Celli, M.D.,<sup>10</sup> and Joan B. Soriano, M.D.,<sup>11</sup>

#### **Author for correspondence:**

Program of Epidemiology & Clinical Research, Fundació Caubet-Cimera Illes Balears,  
Recinte Hospital Joan March, Bunyola 07110, Spain.

Tel: +34 971 148437

Fax: +34 971 148442

Email: [jbsoriano@caubet-cimera.es](mailto:jbsoriano@caubet-cimera.es)

<sup>1</sup> Respiratory Department, Hospital Universitario Miguel Servet, Zaragoza, Spain.

[jmmarint@unizar.es](mailto:jmmarint@unizar.es)

<sup>2</sup> Respiratory Department, Valme University Hospital, Sevilla, Spain. [ialfageme@separ.es](mailto:ialfageme@separ.es)

<sup>3</sup> Internal Medicine Unit, Hospital Universitari Mutua de Terrassa, Barcelona, Spain.

[palmagro@mutuaterrassa.es](mailto:palmagro@mutuaterrassa.es)

<sup>4</sup> Respiratory Department, Hospital Nuestra Señora de la Candelaria, Tenerife, Spain.

[casanovaciro@gmail.com](mailto:casanovaciro@gmail.com)

<sup>5</sup> Respiratory Department, Hospital Galdakao-Usansolo, Bizkaia, Spain,

[crisobal\\_esteban@yahoo.es](mailto:crisobal_esteban@yahoo.es)

<sup>6</sup> Respiratory Unit, Hospital General de Requena, Valencia, Spain. [JJSOLER@telefonica.net](mailto:JJSOLER@telefonica.net)

<sup>7</sup> Respiratory Department, Clínica Universidad de Navarra, Pamplona, Spain.

[jupa65@hotmail.com](mailto:jupa65@hotmail.com)

<sup>8</sup> CAIBER, Oficina de Investigación Biosanitaria de Asturias, Oviedo, Spain.

[pmcambor@hotmail.com](mailto:pmcambor@hotmail.com)

<sup>9</sup> Institut d'Investigacions Biomèdiques Agustí Pi Sunyer, Hospital Clínic, Barcelona, Spain.

[marcm@separ.es](mailto:marcm@separ.es)

<sup>10</sup> Pulmonary and Critical Care Medicine, Brigham and Women's Hospital, Harvard

University, Boston, MA, USA. [BCelli@copdnet.org](mailto:BCelli@copdnet.org)

<sup>11</sup>. Program of Epidemiology & Clinical Research, Fundació Caubet-Cimera Illes Balears,

Bunyola, Spain. [jbsoriano@caubet-cimera.es](mailto:jbsoriano@caubet-cimera.es)

**eTable 1.** COPD multicomponent indices. Note: In grey those indices not tested in POOLE given that some variables were unavailable

| Variable                                 | BODE                                                  | mBODE                                                                | e-BODE                                                | BODEx                                               | ADO                                                                           | CPI                                                     | SAFE                                                  | HADO                                                | COPDSS                                                                     | TARDIS                                          | DOSE                                  |
|------------------------------------------|-------------------------------------------------------|----------------------------------------------------------------------|-------------------------------------------------------|-----------------------------------------------------|-------------------------------------------------------------------------------|---------------------------------------------------------|-------------------------------------------------------|-----------------------------------------------------|----------------------------------------------------------------------------|-------------------------------------------------|---------------------------------------|
| BMI                                      | 0 (>21);<br>1 (≤21)                                   | 0 (>21);<br>1 (≤21)                                                  | 0 (>21);<br>1 (≤21)                                   | 0 (>21);<br>1 (≤21)                                 |                                                                               | 0 (≥20);<br>11 (<20)                                    |                                                       |                                                     |                                                                            | 1 (≤18.5);<br>0 (18.5-25)<br>-1 (>25)           |                                       |
| Obstruction<br>(%pred FEV <sub>1</sub> ) | 0 (≥65%);<br>1 (50–64%);<br>2 (36–49%);<br>3 (≤35%)   | 0 (≥65%);<br>1 (50–64%);<br>2 (36–49%);<br>3 (≤35%)                  | 0 (≥65%);<br>1 (50–64%);<br>2 (36–49%);<br>3 (≤35%)   | 0 (≥65%);<br>1 (50–64%);<br>2 (36–49%);<br>3 (≤35%) | 0 (≥65%);<br>1 (≥36–<br>64%);<br>2 (≤35%)                                     | 24 (<30%);<br>15 (30–49%);<br>7 (50–59%);<br>0 (≥60%)   | 0 (≥80%);<br>1 (50–79%);<br>2 (30–49%);<br>3 (<30%)   | 3 (≥65%);<br>2 (50–64%);<br>1 (36–49%);<br>0 (≤35%) |                                                                            | 0 (≥50%);<br>1 (30–49%);<br>2 (<30%)            | 0 (≥50%);<br>1 (30–49%);<br>2 (<30%)  |
| Dyspnoea<br>(mMRC)                       | 0 (0-1);<br>1 (2);<br>2 (3);<br>3 (4)                 | 0 (0-1);<br>1 (2);<br>2 (3);<br>3 (4)                                | 0 (0-1);<br>1 (2);<br>2 (3);<br>3 (4)                 | 0 (0-1);<br>1 (2);<br>2 (3);<br>3 (4)               | 0 (0-1);<br>1 (2);<br>2 (3);<br>3 (4)                                         |                                                         |                                                       | 3 (1);<br>2 (2);<br>1 (3);<br>0 (4-5)               | 0 (0-1);<br>1 (2);<br>2 (3);<br>3 (4)                                      | 0 (1);<br>2 (2);<br>3 (3);<br>4 (4-5)           | 0 (0-1);<br>1 (2);<br>2 (3);<br>3 (4) |
| Exercise<br>(6-MWT)                      | 0 (≥350);<br>1 (250-349);<br>2 (150-249);<br>3 (≤149) |                                                                      | 0 (≥350);<br>1 (250-349);<br>2 (150-249);<br>3 (≤149) |                                                     |                                                                               |                                                         | 0 (≥400);<br>1 (300-399);<br>2 (200-299);<br>3 (≤199) |                                                     |                                                                            |                                                 |                                       |
| VO <sub>2</sub>                          |                                                       | 0 (>70%pred);<br>1 (60–69%pred);<br>2 (40–59%pred);<br>3 (<40% pred) |                                                       |                                                     |                                                                               |                                                         |                                                       |                                                     |                                                                            |                                                 |                                       |
| Severe<br>Exacerbations                  |                                                       |                                                                      | 0 (none);<br>1 (1-2);<br>2 (>2)                       | 0 (none);<br>1 (1-2);<br>2 (>2)                     |                                                                               | 0 (no);<br>20 (yes)                                     |                                                       |                                                     | 3 (Hospitalised last 5 yr);<br>5 (Intubated last 5 yr);<br>5 (Home oxygen) | 0 (no);<br>3 (yes)                              | 0 (none or 1);<br>1 (2-3);<br>2 (>3)  |
| Age                                      |                                                       |                                                                      |                                                       |                                                     | 0 (40–49);<br>1 (50–59);<br>2 (60–69);<br>3 (70–79);<br>4 (80–89);<br>5 (≥90) | 0 (< 55);<br>7 (55- 64);<br>14 ( 65- 74);<br>20 ( ≥ 75) |                                                       |                                                     |                                                                            | 0 (<60);<br>1 (60–69);<br>2 (70–79);<br>3 (≥80) |                                       |
| History of CVD                           |                                                       |                                                                      |                                                       |                                                     |                                                                               | 0 (no);<br>7 (yes)                                      |                                                       |                                                     |                                                                            | 0 (no);<br>3 (yes)                              |                                       |
| Quality of Life<br>(SGRQ score)          |                                                       |                                                                      |                                                       |                                                     |                                                                               | 18 (>64);<br>13 (47-64);<br>7 (30-47);<br>0 (≥30)       | 0 (≤30);<br>1 ( 31-49);<br>2 (50-64);<br>3 (≥65)      |                                                     |                                                                            |                                                 |                                       |
| Gender                                   |                                                       |                                                                      |                                                       |                                                     |                                                                               | 0 (male);<br>1 (female)                                 |                                                       |                                                     |                                                                            |                                                 |                                       |
| Physical Activity                        |                                                       |                                                                      |                                                       |                                                     |                                                                               |                                                         |                                                       | 3 (3);<br>2 (2);<br>1 (1);<br>0 (0)                 |                                                                            |                                                 |                                       |
| Health status                            |                                                       |                                                                      |                                                       |                                                     |                                                                               |                                                         |                                                       | 3 (very good);<br>2 (good);<br>1 (fair);<br>0 (bad) |                                                                            |                                                 |                                       |
| Systemic CS                              |                                                       |                                                                      |                                                       |                                                     |                                                                               |                                                         |                                                       |                                                     | 1 (ever);<br>3 (long-term);<br>1 (past 2-wk)                               |                                                 |                                       |
| Other medication                         |                                                       |                                                                      |                                                       |                                                     |                                                                               |                                                         |                                                       |                                                     | Multiple (up to 10 points)                                                 |                                                 |                                       |
| Influenza<br>vaccination                 |                                                       |                                                                      |                                                       |                                                     |                                                                               |                                                         |                                                       |                                                     |                                                                            | 1 (no);<br>0 (yes)                              |                                       |
| Smoking                                  |                                                       |                                                                      |                                                       |                                                     |                                                                               |                                                         |                                                       |                                                     |                                                                            |                                                 | 1 (smoker);<br>0 (non)                |
| <i>Comorbidities</i>                     |                                                       |                                                                      |                                                       |                                                     |                                                                               |                                                         |                                                       |                                                     |                                                                            |                                                 |                                       |
| <b>SCORE range</b>                       | <b>0-10</b>                                           | <b>0-10</b>                                                          | <b>0-12</b>                                           | <b>0-9</b>                                          | <b>0-10</b>                                                                   | <b>0-100</b>                                            | <b>0-9</b>                                            | <b>0-12</b>                                         | <b>0-35</b>                                                                | <b>0-15</b>                                     | <b>0-8</b>                            |

**eFigure 1.** Location of COPD cohorts in Spain

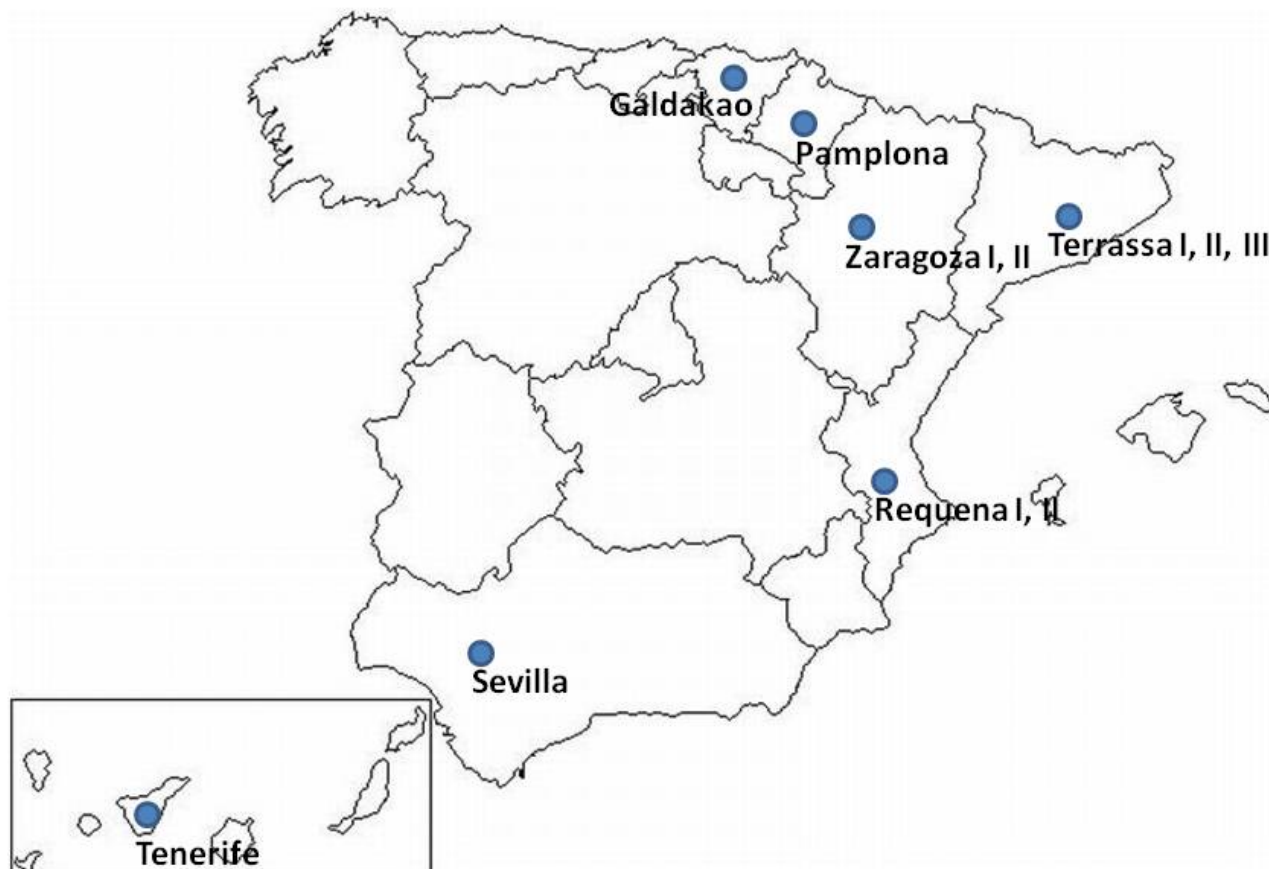

**eFigure 2.** Change in C statistics for the six available indices with time (up to 10 years): A) crude; B) adjusted by age.

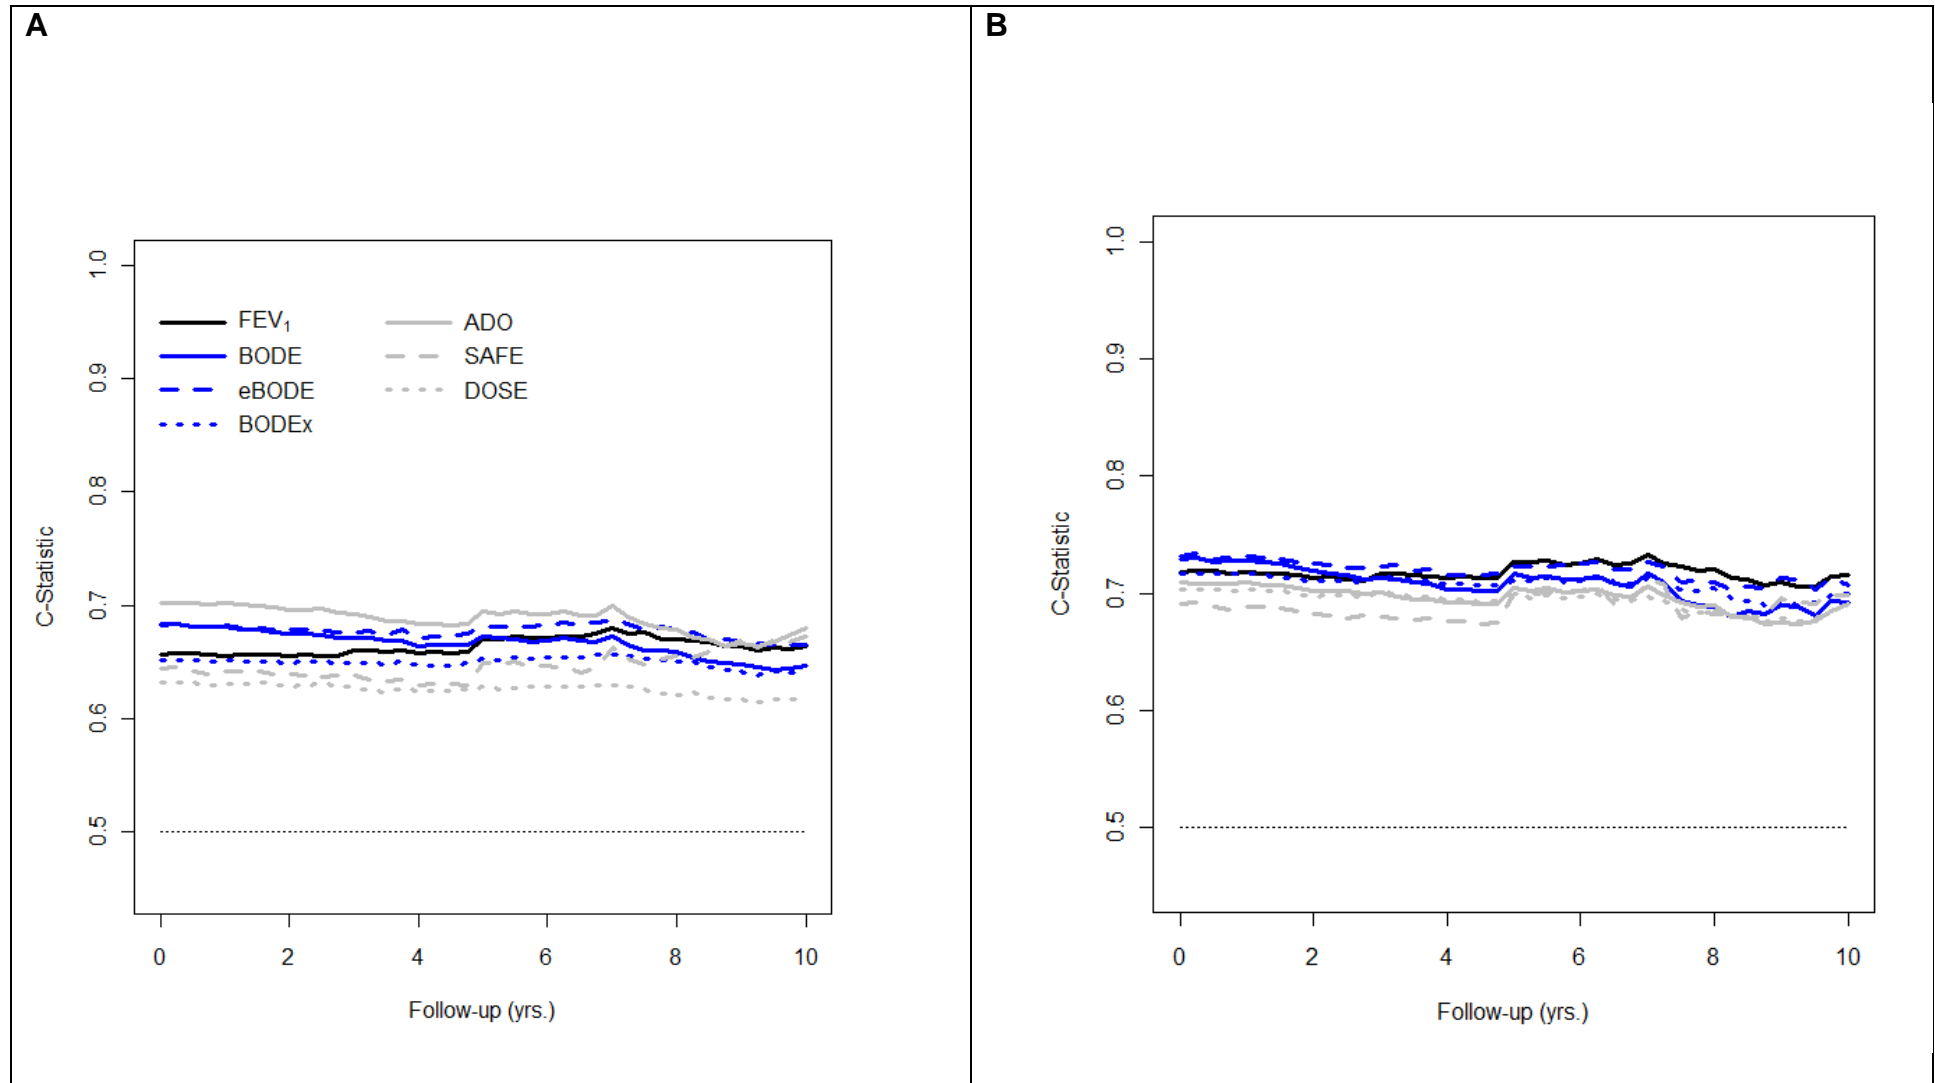

Supplement: F-ONLINE_APPENDIX_-_COCOMICS_ERJ.pdf [file F-ONLINE_APPENDIX_-_COCOMICS_ERJ.pdf]
